# Supplementary material for: A novel deep learning method for large-scale analysis of bone marrow adiposity using UK Biobank Dixon MRI data
Source: PubMed Central journal article supplement (PMC10806280; doi:10.1016/j.csbj.2023.12.029), 2023-12-27
Supplement: mmc1.pdf [file mmc1.pdf]

## SUPPLEMENTAL DIGITAL CONTENT

### A novel deep learning method for large-scale analysis of bone marrow adiposity using UK Biobank Dixon MRI data

Morris and Wang *et al.*

#### SUPPLEMENTAL DIGITAL CONTENT

The Supplemental Digital Content includes one data file (.xlsx) and five tables, as follows:

**Supplemental Data** – An .xlsx spreadsheet describing PheCodes for skeletal conditions, which were assessed among the validation cohort because these conditions might affect skeletal morphology and thereby influence deep learning segmentation. For each PheCode the following are shown: corresponding ICD10 and ICD9 codes; the disease description from each coding system; the prevalence among participants in the validation cohort; and the prevalence among participants giving faulty or normal segmentation outputs for each skeletal site. This demonstrates that PheCode prevalence is similar among faulty and normal segmentations, confirming that skeletal pathologies are not a systematic cause of faulty segmentation outputs from this cohort.

**Supplemental Table 1** – Univariable associations between spine BMD and BMFF, Age, BMI or adiposity traits.

**Supplemental Table 2** – Univariable associations between femoral head BMD and BMFF, Age, BMI or adiposity traits.

**Supplemental Table 3** – Univariable associations between total hip BMD and BMFF, Age, BMI or adiposity traits.

**Supplemental Table 4** – Univariable associations between femoral shaft BMD and BMFF, Age, BMI or adiposity traits.

**Supplemental Table 5** – Univariable associations between BMFF at each region and Age, BMI or adiposity traits.

| Dependent    | Explanatory   | Sex                            | $\beta$ (95% CIs)              | Adj. R <sup>2</sup> | P (Exp)         | P (Exp*Sex)      |
|--------------|---------------|--------------------------------|--------------------------------|---------------------|-----------------|------------------|
| BMD Spine    | BMFF Spine    | Both                           | <b>-0.004 (-0.006, -0.003)</b> | <b>0.390</b>        | <b>1.09E-09</b> | 0.431            |
|              | Age           | Both                           | 0 (-0.004, 0.003)              | 0.352               | 0.930           | <b>0.021</b>     |
|              |               | F                              | -0.003 (-0.007, 0.001)         | 0.003               | 0.116           | -                |
|              |               | M                              | 0.005 (-0.001, 0.012)          | 0.006               | 0.108           | -                |
|              | BMI           | Both                           | <b>0.023 (0.017, 0.029)</b>    | <b>0.395</b>        | <b>1.61E-12</b> | <b>7.827E-05</b> |
|              |               | F                              | <b>0.015 (0.008, 0.022)</b>    | <b>0.036</b>        | <b>3.28E-05</b> | -                |
|              |               | M                              | <b>0.043 (0.03, 0.055)</b>     | <b>0.137</b>        | <b>1.25E-10</b> | -                |
|              | VAT mass (kg) | Both                           | <b>0.081 (0.054, 0.109)</b>    | <b>0.380</b>        | <b>1.01E-08</b> | 0.840            |
|              | Total fat %   | Both                           | 0.002 (0, 0.004)               | 0.354               | 0.119           | 0.438            |
|              | Android fat % | Both                           | <b>0.002 (0.001, 0.004)</b>    | <b>0.369</b>        | <b>9.25E-06</b> | 0.904            |
| Gynoid fat % | Both          | -0.002 (-0.004, 0)             | 0.354                          | 0.096               | 0.208           |                  |
| Trunk fat %  | Both          | <b>0.003 (0.001, 0.004)</b>    | <b>0.365</b>                   | <b>8.84E-05</b>     | 0.716           |                  |
| Legs fat %   | Both          | <b>-0.004 (-0.006, -0.001)</b> | <b>0.362</b>                   | <b>6.78E-04</b>     | 0.276           |                  |

**Supplemental Table 1 – Univariable associations between spine BMD and BMFF, Age, BMI or adiposity traits.** To test if the explanatory-dependent relationship differs between males and F, a linear model was first analysed across both sexes, with sex included as an interacting variable. Beta coefficients are shown (with lower and upper 95% CIs in brackets), followed by the adjusted R<sup>2</sup> (Adj. R<sup>2</sup>) and unadjusted P value for each explanatory variable (P Exp). P values were also calculated for the Explanatory\*Sex interaction (P Exp\*Sex); if significant, additional linear models were analysed in females (F) and males (M) separately. Because 13 correlations were assessed, the Bonferroni-adjusted alpha level for P (Exp) is 0.05/13 = 0.0038. Significant explanatory-dependent relationships are highlighted in bold.

| Dependent              | Explanatory       | Sex  | $\beta$ (95% CIs)              | Adj. R <sup>2</sup> | P (Exp)         | P (Exp*Sex) |
|------------------------|-------------------|------|--------------------------------|---------------------|-----------------|-------------|
| BMD<br>Femoral<br>Neck | BMFF Femoral Head | Both | <b>-0.022 (-0.026, -0.018)</b> | <b>0.259</b>        | <b>2.19E-21</b> | 0.566       |
|                        | BMFF Total Hip    | Both | <b>-0.015 (-0.018, -0.012)</b> | <b>0.244</b>        | <b>1.76E-20</b> | 0.340       |
|                        | BMFF Spine        | Both | <b>-0.004 (-0.006, -0.003)</b> | <b>0.201</b>        | <b>6.73E-12</b> | 0.886       |
|                        | Age               | Both | -0.002 (-0.005, 0.001)         | 0.142               | 2.58E-01        | 0.809       |
|                        | BMI               | Both | <b>0.014 (0.008, 0.02)</b>     | <b>0.167</b>        | <b>2.17E-06</b> | 0.070       |
|                        | VAT mass (kg)     | Both | 0.021 (-0.005, 0.046)          | 0.143               | 1.13E-01        | 0.572       |
|                        | Total fat %       | Both | -0.001 (-0.002, 0.001)         | 0.141               | 4.38E-01        | 0.438       |
|                        | Android fat %     | Both | 0 (-0.001, 0.001)              | 0.140               | 7.60E-01        | 0.381       |
|                        | Gynoid fat %      | Both | -0.002 (-0.004, 0)             | 0.144               | 8.71E-02        | 0.693       |
|                        | Trunk fat %       | Both | 0 (-0.001, 0.001)              | 0.140               | 7.68E-01        | 0.553       |
|                        | Legs fat %        | Both | <b>-0.003 (-0.004, -0.001)</b> | <b>0.149</b>        | <b>7.63E-03</b> | 0.323       |

**Supplemental Table 2 – Univariable associations between femoral head BMD and BMFF, Age, BMI or adiposity traits.** Linear models were established as described for Supplemental Table 1. Because 11 correlations were assessed, the Bonferroni-adjusted alpha level for *P* (Exp) is 0.05/11 = 0.0045. Significant explanatory-dependent relationships are highlighted in bold.

| Dependent     | Explanatory       | Sex  | $\beta$ (95% CIs)              | Adj. R <sup>2</sup> | P (Exp)          | P (Exp*Sex)  |
|---------------|-------------------|------|--------------------------------|---------------------|------------------|--------------|
| BMD Total Hip | BMFF Femoral Head | Both | <b>-0.023 (-0.027, -0.018)</b> | <b>0.336</b>        | <b>1.12E-19</b>  | <b>0.838</b> |
|               | BMFF Total Hip    | Both | <b>-0.017 (-0.02, -0.014)</b>  | <b>0.340</b>        | <b>1.065E-23</b> | 0.059        |
|               | Age               | Both | -0.002 (-0.005, 0.001)         | 0.234               | 0.226            | 0.770        |
|               | BMI               | Both | <b>0.022 (0.016, 0.028)</b>    | <b>0.282</b>        | <b>3.044E-12</b> | 0.111        |
|               | VAT mass (kg)     | Both | <b>0.044 (0.017, 0.071)</b>    | <b>0.242</b>        | <b>0.002</b>     | 0.979        |
|               | Total fat %       | Both | 0 (-0.002, 0.002)              | 0.232               | 0.929            | 0.175        |
|               | Android fat %     | Both | 0.001 (0, 0.002)               | 0.235               | 0.091            | 0.225        |
|               | Gynoid fat %      | Both | -0.002 (-0.004, 0)             | 0.236               | 0.043            | 0.248        |
|               | Trunk fat %       | Both | 0.001 (0, 0.002)               | 0.235               | 0.106            | 0.240        |
|               | Legs fat %        | Both | <b>-0.003 (-0.005, -0.001)</b> | <b>0.244</b>        | <b>6.93E-04</b>  | 0.115        |

**Supplemental Table 3 – Univariable associations between total hip BMD and BMFF, Age, BMI or adiposity traits.** Linear models were established as described for Supplemental Table 1. Because 10 correlations were assessed, the Bonferroni-adjusted alpha level for *P* (Exp) is 0.05/10 = 0.005. Significant explanatory-dependent relationships are highlighted in bold.

| Dependent               | Explanatory            | Sex  | $\beta$ (95% CIs)              | Adj. R <sup>2</sup> | P (Exp)          | P (Exp*Sex) |
|-------------------------|------------------------|------|--------------------------------|---------------------|------------------|-------------|
| BMD<br>Femoral<br>shaft | BMFF Femoral Diaphysis | Both | <b>-0.015 (-0.018, -0.012)</b> | <b>0.285</b>        | <b>2.20E-24</b>  | 0.766       |
|                         | Age                    | Both | -0.004 (-0.008, 0.001)         | 0.152               | 0.086            | 0.439       |
|                         | BMI                    | Both | <b>0.024 (0.016, 0.032)</b>    | <b>0.191</b>        | <b>1.319E-09</b> | 0.337       |
|                         | VAT mass (kg)          | Both | <b>0.046 (0.012, 0.08)</b>     | <b>0.156</b>        | <b>0.008</b>     | 0.983       |
|                         | Total fat %            | Both | 0 (-0.003, 0.002)              | 0.149               | 0.870            | 0.419       |
|                         | Android fat %          | Both | 0.001 (0, 0.002)               | 0.151               | 0.149            | 0.355       |
|                         | Gynoid fat %           | Both | -0.002 (-0.005, 0)             | 0.153               | 0.062            | 0.579       |
|                         | Trunk fat %            | Both | 0.001 (0, 0.003)               | 0.151               | 0.153            | 0.409       |
|                         | Legs fat %             | Both | <b>-0.004 (-0.007, -0.002)</b> | <b>0.161</b>        | <b>0.001</b>     | 0.427       |

**Supplemental Table 4 – Univariable associations between femoral shaft BMD and BMFF, Age, BMI or adiposity traits.** Linear models were established as described for Supplemental Table 1. Because 9 correlations were assessed, the Bonferroni-adjusted alpha level for  $P$  (Exp) is  $0.05/9 = 0.0056$ . Significant explanatory-dependent relationships are highlighted in bold.

| Dependent              | Explanatory    | Sex            | $\beta$ (95% CIs)                                                                          | Adj. R <sup>2</sup>                    | P (Exp)                                       | P (Exp*Sex)            |       |
|------------------------|----------------|----------------|--------------------------------------------------------------------------------------------|----------------------------------------|-----------------------------------------------|------------------------|-------|
| BMFF Spine             | Age            | Both           | <b>0.269 (0.08, 0.459)</b>                                                                 | <b>0.127</b>                           | <b>0.005</b>                                  | 0.542                  |       |
|                        | BMI            | Both           | 0.219 (-0.138, 0.576)                                                                      | 0.119                                  | 0.229                                         | 0.425                  |       |
|                        | VAT mass (kg)  | Both           | <b>5.331 (3.833, 6.829)</b>                                                                | <b>0.177</b>                           | <b>6.640E-12</b>                              | 0.549                  |       |
|                        | Total fat %    | Both           | <b>0.372 (0.267, 0.476)</b>                                                                | <b>0.176</b>                           | <b>6.492E-12</b>                              | 0.075                  |       |
|                        | Android fat %  | Both           | <b>0.226 (0.167, 0.285)</b>                                                                | <b>0.185</b>                           | <b>1.14E-13</b>                               | 0.157                  |       |
|                        | Gynoid fat %   | Both           | <b>0.241 (0.129, 0.352)</b>                                                                | <b>0.140</b>                           | <b>2.53E-05</b>                               | 0.078                  |       |
|                        | Trunk fat %    | Both           | <b>0.287 (0.214, 0.36)</b>                                                                 | <b>0.188</b>                           | <b>3.73E-14</b>                               | 0.214                  |       |
|                        | Legs fat %     | Both<br>F<br>M | 0.141 (0.03, 0.252)<br>0.061 (-0.06, 0.183)<br><b>0.4 (0.159, 0.641)</b>                   | 0.125<br>0.000<br><b>0.037</b>         | 0.013<br>0.323<br><b>0.001</b>                | <b>0.011</b><br>-<br>- |       |
| BMFF Femoral Head      | Age            | Both<br>F<br>M | 0.047 (-0.008, 0.102)<br>0.088 (0.014, 0.278)<br>-0.031 (-0.109, 0.047)                    | 0.130<br>0.162<br>-0.002               | 0.093<br>0.019<br>0.435                       | <b>0.043</b><br>-<br>- |       |
|                        | BMI            | Both           | -0.041 (-0.146, 0.064)                                                                     | 0.127                                  | 0.445                                         | 0.361                  |       |
|                        | VAT mass (kg)  | Both           | 0.106 (-0.563, 0.351)                                                                      | 0.127                                  | 0.649                                         | 0.068                  |       |
|                        | Total fat %    | Both<br>F<br>M | 0.026 (-0.006, 0.059)<br>0.051 (0.01, 0.092)<br>-0.04 (-0.092, 0.012)                      | 0.129<br>0.012<br>0.006                | 0.110<br>0.015<br>0.128                       | <b>0.014</b><br>-<br>- |       |
|                        | Android fat %  | Both           | 0.003 (-0.016, 0.021)                                                                      | 0.126                                  | 0.781                                         | 0.093                  |       |
|                        | Gynoid fat %   | Both<br>F<br>M | 0.041 (0.007, 0.074)<br><b>0.067 (0.024, 0.109)</b><br>-0.033 (-0.087, 0.022)              | 0.134<br><b>0.021</b><br>0.002         | 0.018<br><b>0.002</b><br>0.237                | <b>0.010</b><br>-<br>- |       |
|                        | Trunk fat %    | Both<br>F<br>M | 0.009 (-0.014, 0.031)<br>0.023 (-0.005, 0.052)<br>-0.032 (-0.067, 0.004)                   | 0.127<br>0.004<br>0.009                | 0.456<br>0.110<br>0.084                       | <b>0.034</b><br>-<br>- |       |
|                        | Legs fat %     | Both           | 0.045 (0.013, 0.078)                                                                       | 0.136                                  | 0.007                                         | 0.142                  |       |
|                        | BMFF Total Hip | Age            | Both                                                                                       | 0.075 (-0.001, 0.15)                   | 0.071                                         | 0.048                  | 0.297 |
|                        |                | BMI            | Both                                                                                       | <b>-0.235 (-0.374, -0.096)</b>         | <b>0.081</b>                                  | <b>9.63E-04</b>        | 0.864 |
|                        |                | VAT mass (kg)  | Both                                                                                       | -0.657 (-1.264, -0.05)                 | 0.073                                         | 0.034                  | 0.852 |
| Total fat %            |                | Both           | 0.007 (-0.035, 0.049)                                                                      | 0.066                                  | 0.743                                         | 0.634                  |       |
| Android fat %          |                | Both           | -0.008 (-0.031, 0.016)                                                                     | 0.066                                  | 0.527                                         | 0.940                  |       |
| Gynoid fat %           |                | Both           | 0.033 (-0.012, 0.077)                                                                      | 0.069                                  | 0.149                                         | 0.466                  |       |
| Trunk fat %            |                | Both           | -0.005 (-0.035, 0.024)                                                                     | 0.066                                  | 0.726                                         | 0.772                  |       |
| Legs fat %             |                | Both           | 0.036 (-0.008, 0.08)                                                                       | 0.069                                  | 0.106                                         | 0.837                  |       |
| BMFF Femoral Diaphysis | Age            | Both           | 0.107 (-0.001, 0.216)                                                                      | 0.048                                  | 0.053                                         | 0.625                  |       |
|                        | BMI            | Both           | -0.133 (-0.337, 0.072)                                                                     | 0.045                                  | 0.202                                         | 0.783                  |       |
|                        | VAT mass (kg)  | Both           | <b>-1.318 (-2.197, -0.438)</b>                                                             | <b>0.056</b>                           | <b>0.003</b>                                  | 0.096                  |       |
|                        | Total fat %    | Both<br>F<br>M | -0.079 (-0.141, -0.018)<br><b>-0.135 (-0.211, -0.059)</b><br>0.04 (-0.066, 0.146)          | 0.052<br><b>0.027</b><br>-0.002        | 0.012<br><b>5.10E-04</b><br>0.456             | <b>0.009</b><br>-<br>- |       |
|                        | Android fat %  | Both<br>F<br>M | <b>-0.067 (-0.101, -0.032)</b><br><b>-0.095 (-0.138, -0.053)</b><br>-0.007 (-0.066, 0.052) | <b>0.063</b><br><b>0.043</b><br>-0.004 | <b>1.597E-04</b><br><b>1.298E-05</b><br>0.823 | <b>0.018</b><br>-<br>- |       |
|                        | Gynoid fat %   | Both<br>F<br>M | 0.019 (-0.046, 0.085)<br>-0.028 (-0.109, 0.053)<br>0.125 (0.013, 0.236)                    | 0.043<br>-0.001<br>0.015               | 0.562<br>0.496<br>0.029                       | <b>0.034</b><br>-<br>- |       |
|                        | Trunk fat %    | Both<br>F<br>M | <b>-0.081 (-0.124, -0.038)</b><br><b>-0.118 (-0.171, -0.065)</b><br>-0.004 (-0.077, 0.07)  | <b>0.062</b><br><b>0.043</b><br>-0.004 | <b>2.183E-04</b><br><b>1.442E-05</b><br>0.920 | <b>0.015</b><br>-<br>- |       |
|                        | Legs fat %     | Both<br>F<br>M | 0.035 (-0.029, 0.1)<br>-0.014 (-0.09, 0.062)<br><b>0.191 (0.066, 0.316)</b>                | 0.044<br>-0.002<br><b>0.032</b>        | 0.286<br>0.725<br><b>0.003</b>                | <b>0.008</b><br>-<br>- |       |

**Supplemental Table 5 – Univariable associations between BMFF at each region and Age, BMI or adiposity traits.** Linear models were established as described for Supplemental Table 1. For each dependent variable, Bonferroni-adjusted alpha levels for  $P$  (Exp) are as follows: BMFF Spine, 0.005 (10 comparisons); BMFF femoral head, 0.0031 (16 comparisons); BMFF total hip, 0.00625 (8 comparisons); BMFF femoral diaphysis, 0.0028 (18 comparisons). Significant explanatory-dependent relationships are highlighted in bold.
